# Supplementary material for: The impacts of climate change on the abundance and distribution of the Spotted Wing Drosophila (Drosophila suzukii) in the United States and Canada
Source: PeerJ. 2017 Apr 6;5:e3192. doi: 10.7717/peerj.3192 (PMC5385127; doi:10.7717/peerj.3192)
Supplement: Supplemental Information 1 — Raw data for normalized populations of historic temperatures and GCM projections as shown in Fig. 6. GCM projections are averaged over all climate model-RCP. [file peerj-05-3192-s001.xlsx]

## Sheet: Sheet1
	Baseline	2020s	2050s	2080s
Bladen, NC	1.10345	0.742745	0.682853	0.734967
Bladen, NC		0.776632	0.666655	0.573375
Bladen, NC		0.135954	0.0165808	0.00697139
Bladen, NC		0.799371	0.605276	0.405194
Bladen, NC		0.740684	0.619318	0.615804
Bladen, NC		0.746157	0.591316	0.57495
Bladen, NC		0.712698	0.539081	0.447009
Bladen, NC		0.671571	0.537117	0.418658
Bladen, NC		0.718475	0.643465	0.595174
Bladen, NC		0.719962	0.605631	0.53015
Bladen, NC		0.749284	0.612645	0.530342
Bladen, NC		0.754854	0.543086	0.387171
Bladen, NC		0.738423	0.674252	0.606348
Bladen, NC		0.697462	0.612813	0.60015
Bladen, NC		0.699765	0.640578	0.515846
Bladen, NC		0.705274	0.560683	0.425843
Burlington, NJ	0.970859	0.947484	0.842502	0.745758
Burlington, NJ		0.934348	0.781173	0.694182
Burlington, NJ		0.0466216	0.220981	0.262279
Burlington, NJ		0.923702	0.693533	0.495567
Burlington, NJ		0.856373	0.750983	0.690655
Burlington, NJ		0.855267	0.610463	0.523514
Burlington, NJ		0.915538	0.536053	0.481948
Burlington, NJ		0.793707	0.613021	0.288423
Burlington, NJ		0.875005	0.723686	0.642703
Burlington, NJ		0.891562	0.676398	0.585205
Burlington, NJ		0.924002	0.710469	0.507395
Burlington, NJ		0.86126	0.543493	0.337313
Burlington, NJ		0.949183	0.851233	0.784429
Burlington, NJ		1	0.862856	0.738376
Burlington, NJ		0.944506	0.785141	0.685592
Burlington, NJ		0.938077	0.69471	0.482432
Wayne, MS	0.801596	0.672073	0.630854	0.625542
Wayne, MS		0.714996	0.598504	0.533322
Wayne, MS		0.128984	0.0294408	0.0189523
Wayne, MS		0.657716	0.495557	0.388001
Wayne, MS		0.629236	0.587044	0.6155
Wayne, MS		0.651442	0.579851	0.560573
Wayne, MS		0.642774	0.552983	0.491024
Wayne, MS		0.63692	0.503109	0.43787
Wayne, MS		0.653123	0.599741	0.549971
Wayne, MS		0.676256	0.577479	0.532427
Wayne, MS		0.660713	0.541384	0.479173
Wayne, MS		0.630917	0.517933	0.35637
Wayne, MS		0.664473	0.64467	0.535683
Wayne, MS		0.620505	0.579874	0.543023
Wayne, MS		0.631219	0.549956	0.5112
Wayne, MS		0.560024	0.488923	0.414388
Allegan, MI	0.485312	0.904824	0.749119	0.628128
Allegan, MI		0.851491	0.686235	0.575977
Allegan, MI		0.407069	0.28753	0.0423434
Allegan, MI		0.87564	0.65462	0.290046
Allegan, MI		0.824702	0.779027	0.640403
Allegan, MI		0.783281	0.692409	0.634951
Allegan, MI		0.816417	0.747399	0.562899
Allegan, MI		0.853891	0.709888	0.318132
Allegan, MI		0.861134	0.772034	0.557653
Allegan, MI		0.857547	0.729093	0.640849
Allegan, MI		0.831735	0.716566	0.591894
Allegan, MI		0.818347	0.595649	0.185539
Allegan, MI		0.841748	0.757402	0.589094
Allegan, MI		0.831162	0.802018	0.660854
Allegan, MI		0.773108	0.721879	0.669402
Allegan, MI		0.853647	0.799356	0.569131
Hillsboro, FL	0.461045	0.179394	0.168454	0.153165
Hillsboro, FL		0.403616	0.161708	0.114115
Hillsboro, FL		0.0959821	0.065577	0.0882203
Hillsboro, FL		0.185547	0.120552	0.105726
Hillsboro, FL		0.177723	0.277121	0.435239
Hillsboro, FL		0.366677	0.142782	0.178762
Hillsboro, FL		0.40724	0.156481	0.133529
Hillsboro, FL		0.426294	0.155714	0.116166
Hillsboro, FL		0.356441	0.160937	0.246336
Hillsboro, FL		0.253951	0.139443	0.143201
Hillsboro, FL		0.262995	0.148796	0.122608
Hillsboro, FL		0.379944	0.115576	0.0906234
Hillsboro, FL		0.148862	0.267782	0.127374
Hillsboro, FL		0.186272	0.167679	0.146141
Hillsboro, FL		0.270049	0.191227	0.126746
Hillsboro, FL		0.169897	0.125127	0.111076
Norfolk, ON	0.286514	0.772087	0.707102	0.615552
Norfolk, ON		0.716937	0.784098	0.669402
Norfolk, ON		0.232572	0.29288	0.221047
Norfolk, ON		0.798541	0.773505	0.49416
Norfolk, ON		0.730148	0.717265	0.577942
Norfolk, ON		0.709594	0.748657	0.671448
Norfolk, ON		0.707879	0.779484	0.637309
Norfolk, ON		0.782018	0.779027	0.484115
Norfolk, ON		0.748158	0.723433	0.545357
Norfolk, ON		0.735721	0.760127	0.708678
Norfolk, ON		0.675306	0.737808	0.676697
Norfolk, ON		0.707233	0.790797	0.42761
Norfolk, ON		0.712002	0.610962	0.497776
Norfolk, ON		0.64732	0.693446	0.572863
Norfolk, ON		0.64035	0.664444	0.664846
Norfolk, ON		0.693593	0.777656	0.674681
Santa Barbara, CA	0.143846	0.00424251	0.00428358	0.00417242
Santa Barbara, CA		0.00449036	0.00462728	0.00468936
Santa Barbara, CA		0.00118157	0.000850419	0.0144984
Santa Barbara, CA		0.0044042	0.00506749	0.00609869
Santa Barbara, CA		0.00469091	0.00483133	0.00448387
Santa Barbara, CA		0.00460349	0.00524023	0.00509517
Santa Barbara, CA		0.00471628	0.00507258	0.00561235
Santa Barbara, CA		0.00468934	0.00568464	0.00649084
Santa Barbara, CA		0.00508443	0.00485898	0.00522915
Santa Barbara, CA		0.00483553	0.00676154	0.00589958
Santa Barbara, CA		0.00503524	0.00527421	0.0101295
Santa Barbara, CA		0.00505302	0.00847021	0.0110225
Santa Barbara, CA		0.00356709	0.00376215	0.00319476
Santa Barbara, CA		0.00341559	0.0042354	0.00381607
Santa Barbara, CA		0.00389298	0.00384251	0.00402494
Santa Barbara, CA		0.00387381	0.00413792	0.00493632
Clark, WA	0.135957	0.0564052	0.0679738	0.0535284
Clark, WA		0.0643	0.0564278	0.0773702
Clark, WA		0.0345976	0.088476	0.0884734
Clark, WA		0.0717302	0.124498	0.112715
Clark, WA		0.0955318	0.0685161	0.0594885
Clark, WA		0.0632834	0.0822481	0.0830411
Clark, WA		0.0506056	0.089278	0.133677
Clark, WA		0.0606907	0.138095	0.0656574
Clark, WA		0.122787	0.0788731	0.100637
Clark, WA		0.114622	0.133446	0.133212
Clark, WA		0.102004	0.13162	0.14272
Clark, WA		0.149496	0.168204	0.111667
Clark, WA		0.0669854	0.0442017	0.0286441
Clark, WA		0.0544186	0.0726322	0.0597797
Clark, WA		0.0535279	0.0532933	0.0654985
Clark, WA		0.068446	0.0790579	0.0486069
Chicoutimi, QC	0.0126038	0.0210655	0.0266254	0.0198841
Chicoutimi, QC		0.01508	0.0629431	0.0616781
Chicoutimi, QC		0.00334737	0.00523204	0.0262288
Chicoutimi, QC		0.0261746	0.0821751	0.32809
Chicoutimi, QC		0.0138062	0.0205512	0.0182464
Chicoutimi, QC		0.0150143	0.0445149	0.0563002
Chicoutimi, QC		0.0107823	0.0350262	0.0995625
Chicoutimi, QC		0.0272071	0.0727409	0.252658
Chicoutimi, QC		0.0145746	0.0286677	0.0232339
Chicoutimi, QC		0.0173514	0.0434916	0.0879753
Chicoutimi, QC		0.0123231	0.0368127	0.08031
Chicoutimi, QC		0.020606	0.110113	0.327407
Chicoutimi, QC		0.0110526	0.00948584	0.00857076
Chicoutimi, QC		0.00763024	0.0241736	0.0151966
Chicoutimi, QC		0.0128691	0.025776	0.0460785
Chicoutimi, QC		0.012861	0.0306084	0.196566
Fraser Valley, BC	0.00462657	0.0236163	0.0228232	0.0232004
Fraser Valley, BC		0.0400076	0.053327	0.0877413
Fraser Valley, BC		0.0694492	0.108267	0.153221
Fraser Valley, BC		0.0501828	0.121746	0.229899
Fraser Valley, BC		0.0221103	0.0332841	0.0176134
Fraser Valley, BC		0.0145422	0.0298355	0.0514244
Fraser Valley, BC		0.0155973	0.0408568	0.105859
Fraser Valley, BC		0.0271987	0.126967	0.0980869
Fraser Valley, BC		0.0307754	0.0459727	0.036673
Fraser Valley, BC		0.03808	0.109865	0.118451
Fraser Valley, BC		0.0459249	0.0814156	0.146009
Fraser Valley, BC		0.0532316	0.109643	0.118176
Fraser Valley, BC		0.0106949	0.0124576	0
Fraser Valley, BC		0.010249	0.028918	0.0153033
Fraser Valley, BC		0.00888854	0.0239974	0.060869
Fraser Valley, BC		0.00889283	0.0348111	0.0397266
